# Supplementary material for: The Synthesis of Poly(Vinyl Alcohol) Grafted with Fluorinated Protic Ionic Liquids Containing Sulfo Functional Groups
Source: MDPI journal article supplement (doi:10.3390/molecules26144158), 2021-07-08
Supplement: s1 [file s1]

## Supporting Information

# The synthesis of poly(vinyl alcohol) grafted with fluorinated protic ionic liquids containing sulfo functional groups

Patrycja Glińska <sup>1</sup>, Andrzej Wolan <sup>1,2</sup>, Wojciech Kujawski <sup>1,\*</sup>, Edyta Rynkowska <sup>1</sup>, and Joanna Kujawa <sup>1</sup>

<sup>1</sup> Nicolaus Copernicus University in Toruń, Faculty of Chemistry, 7 Gagarina Street, 87-100 Toruń, Poland

<sup>2</sup> Synthex Technologies Sp. z o.o., 7 Gagarina Street, 87-100 Toruń, Poland

\* Correspondence: kujawski@chem.umk.pl

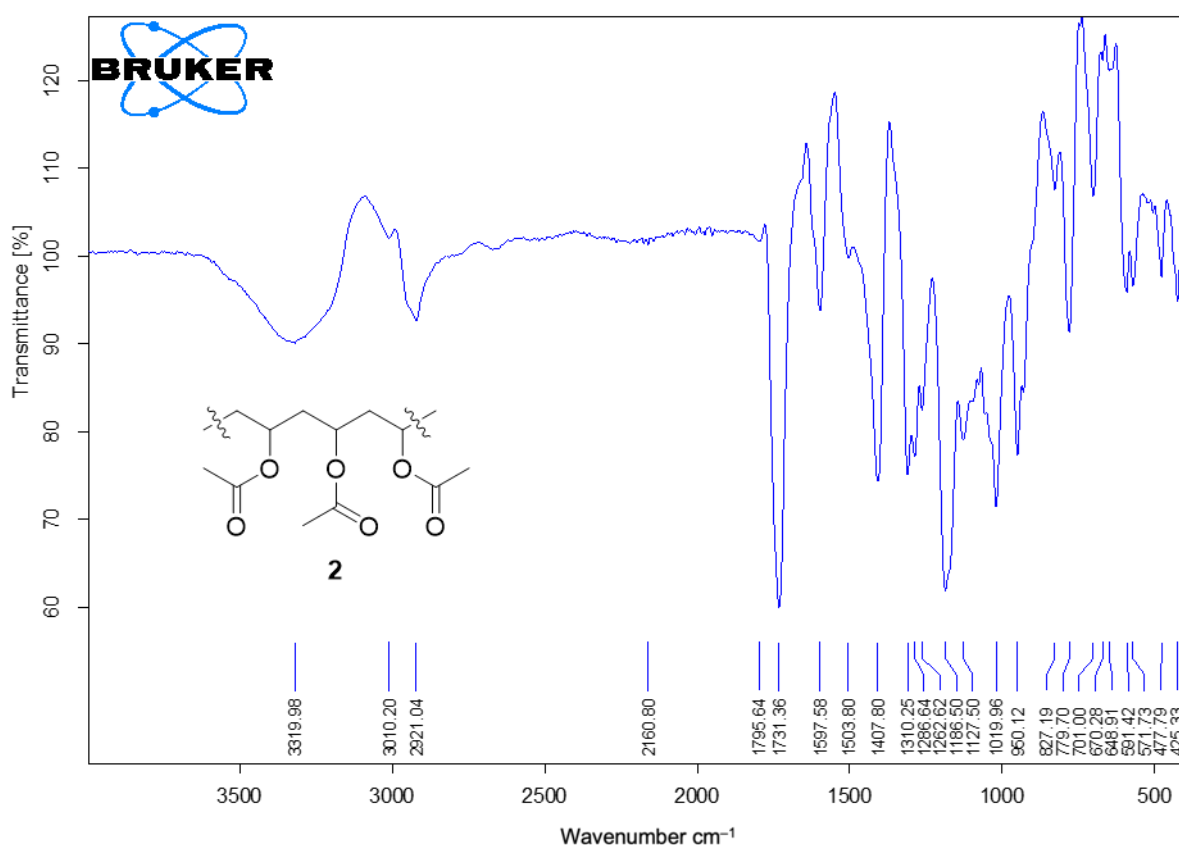

Figure S1. IR spectrum of polymer I (PVA-Ac) (2)

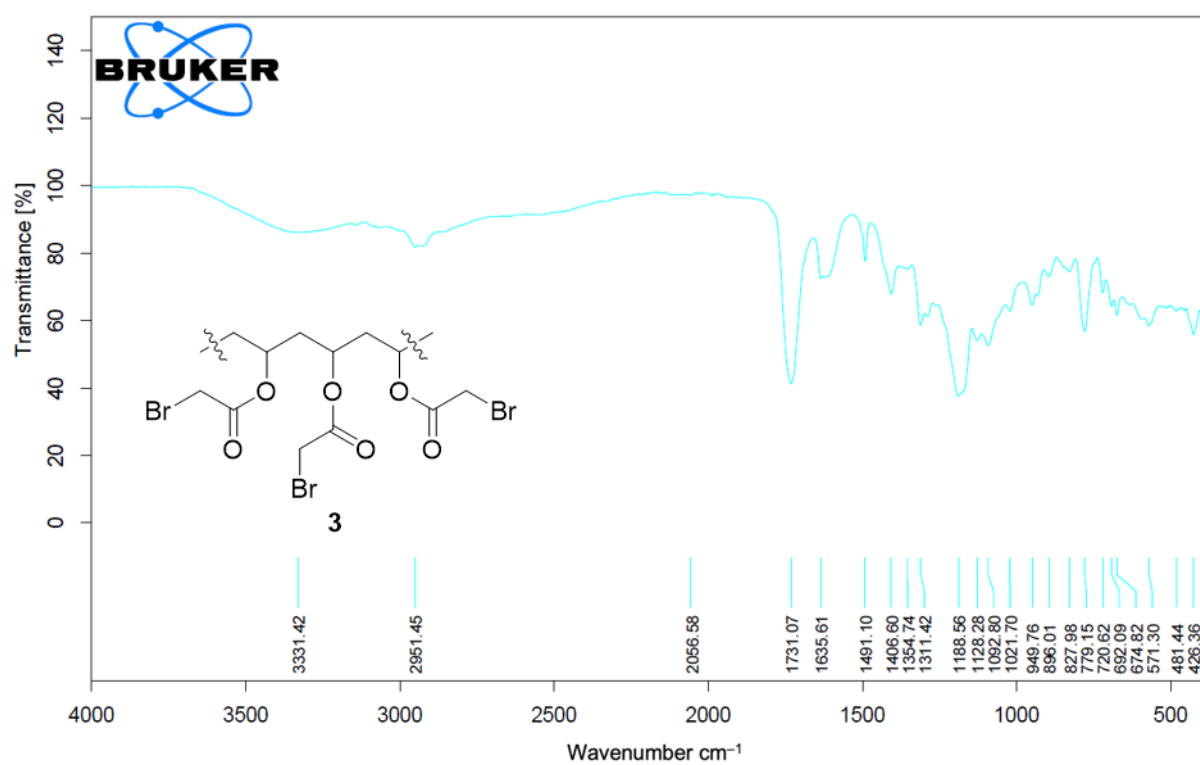

Figure S2. IR spectrum of polymer II (PVA-AcBr) (3)

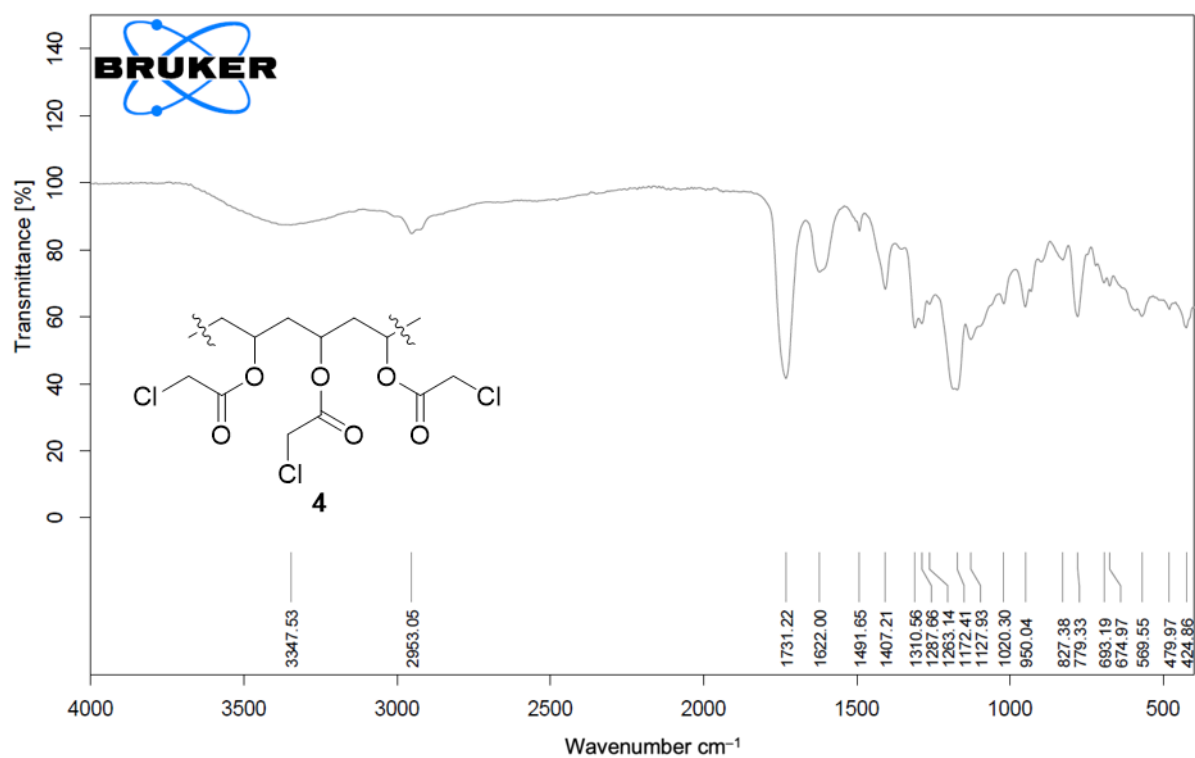

Figure S3. IR spectrum of polymer III (PVA-AcCl) (4)

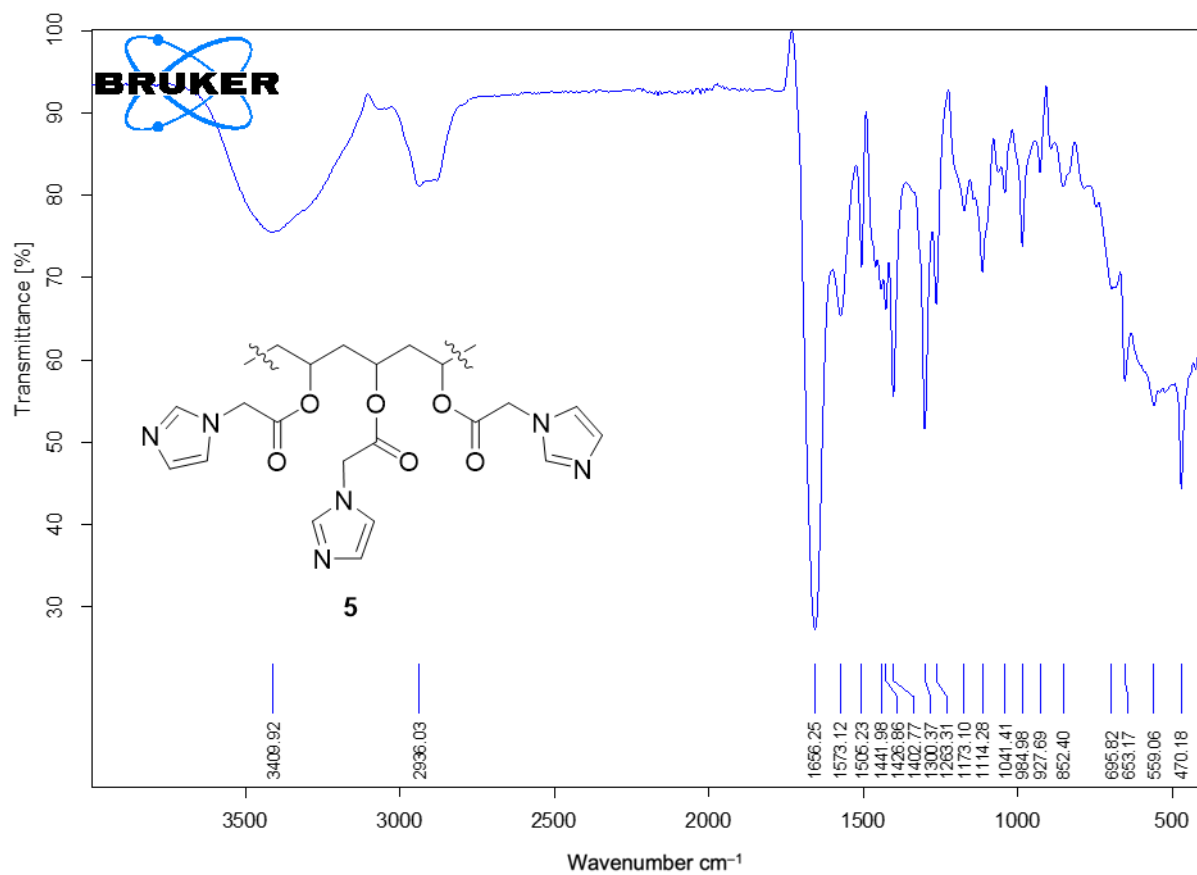

Figure S4. IR spectrum of polymer IV (PVA-AcIm) (5)

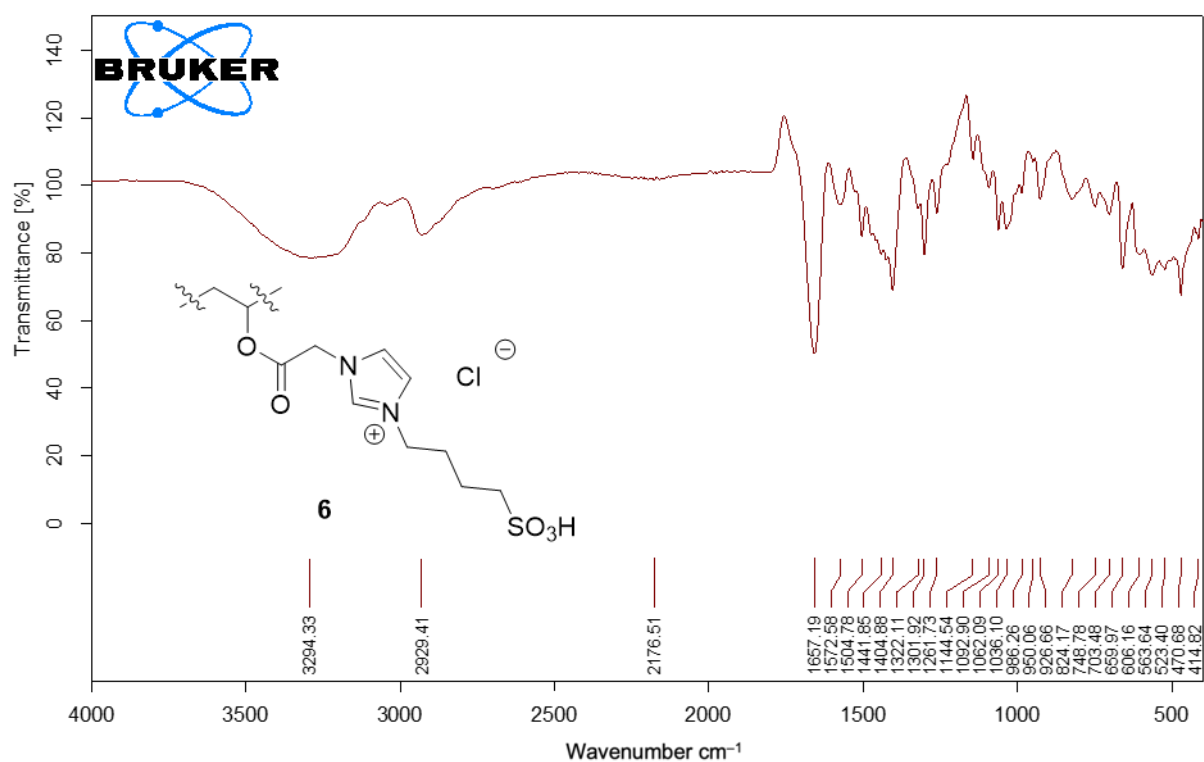

Figure S5. IR spectrum of polymer V (PVA-AcIm-1,4) (6)

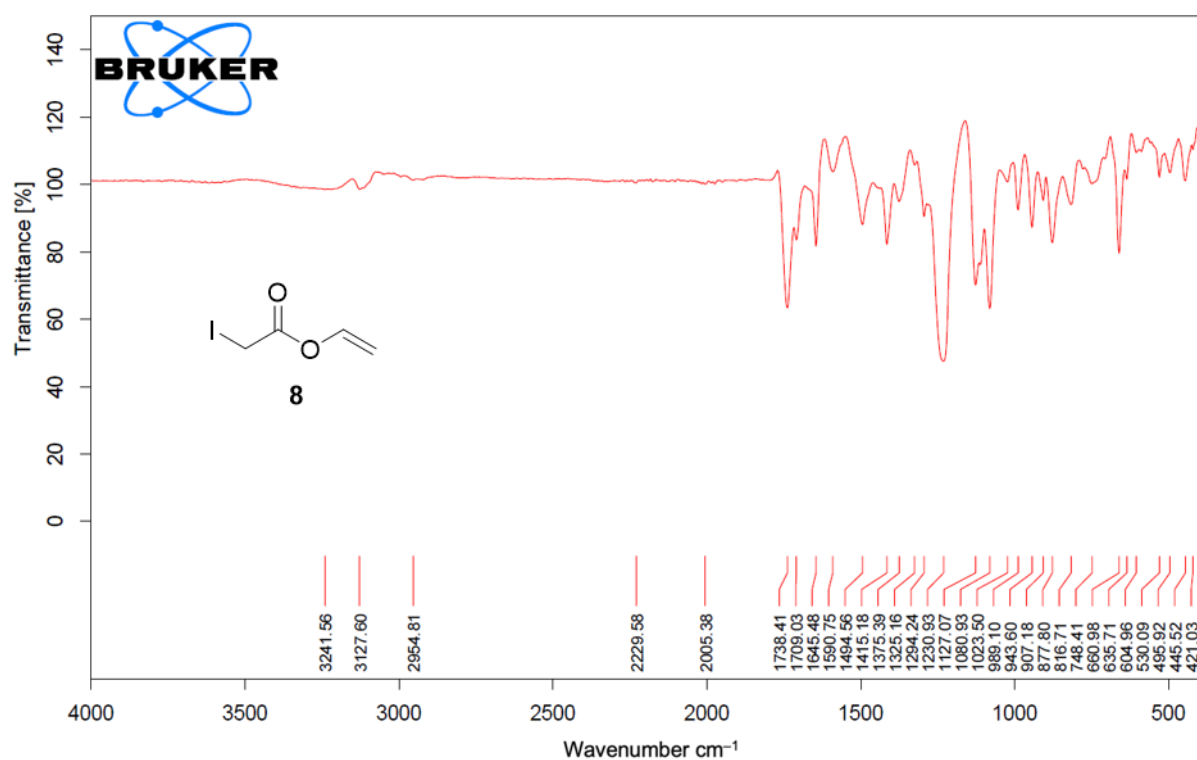

Figure S6. IR spectrum of vinyl 2-iodoacetate (8)

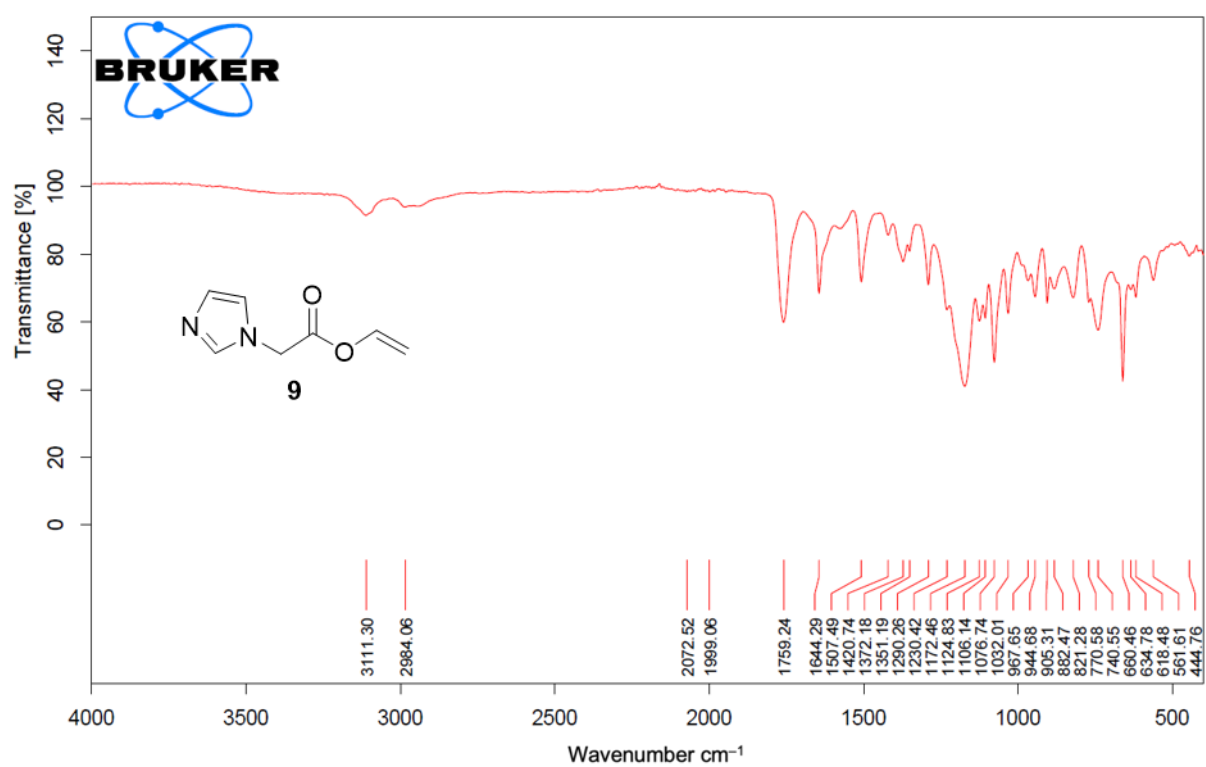

Figure S7. IR spectrum of vinyl 2-(1H-imidazol-1-yl)acetate (9)

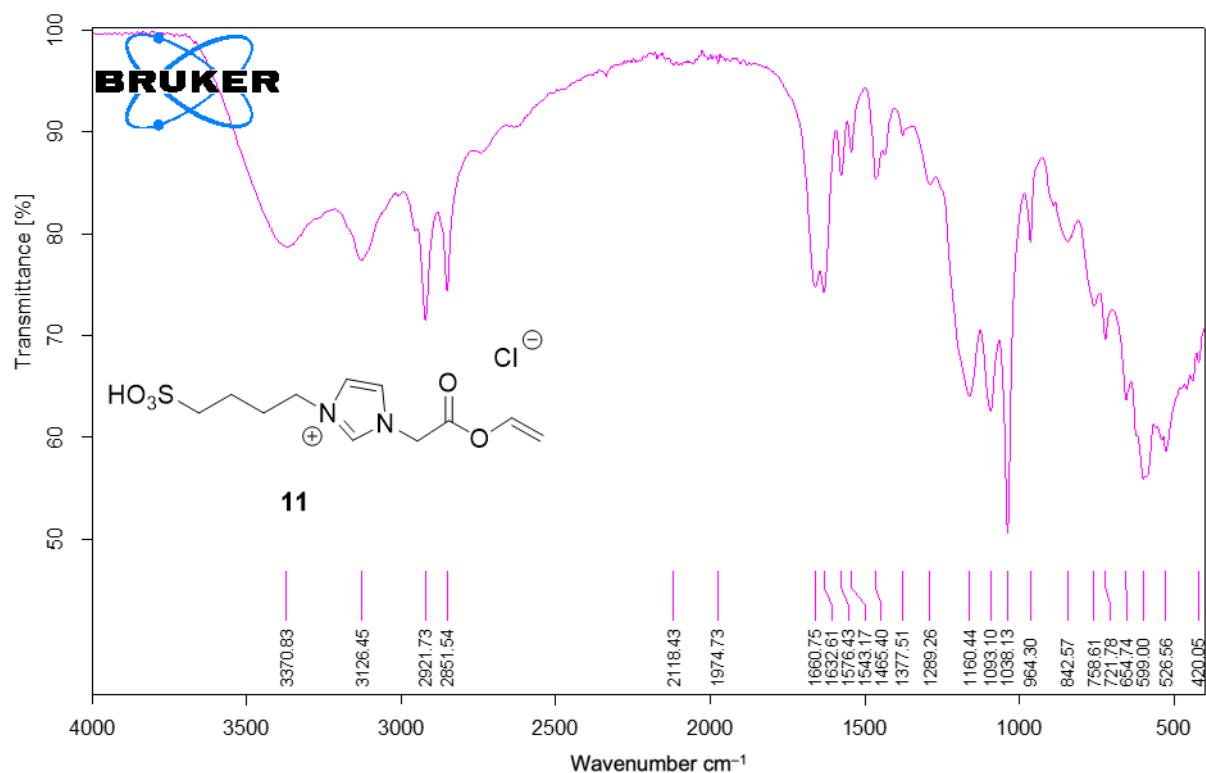

Figure S8. IR spectrum of 1-(2-Oxo-2-(vinylloxy)ethyl)-3-(4-sulfobutyl)-1H-imidazol-3-ium chloride (**11**)



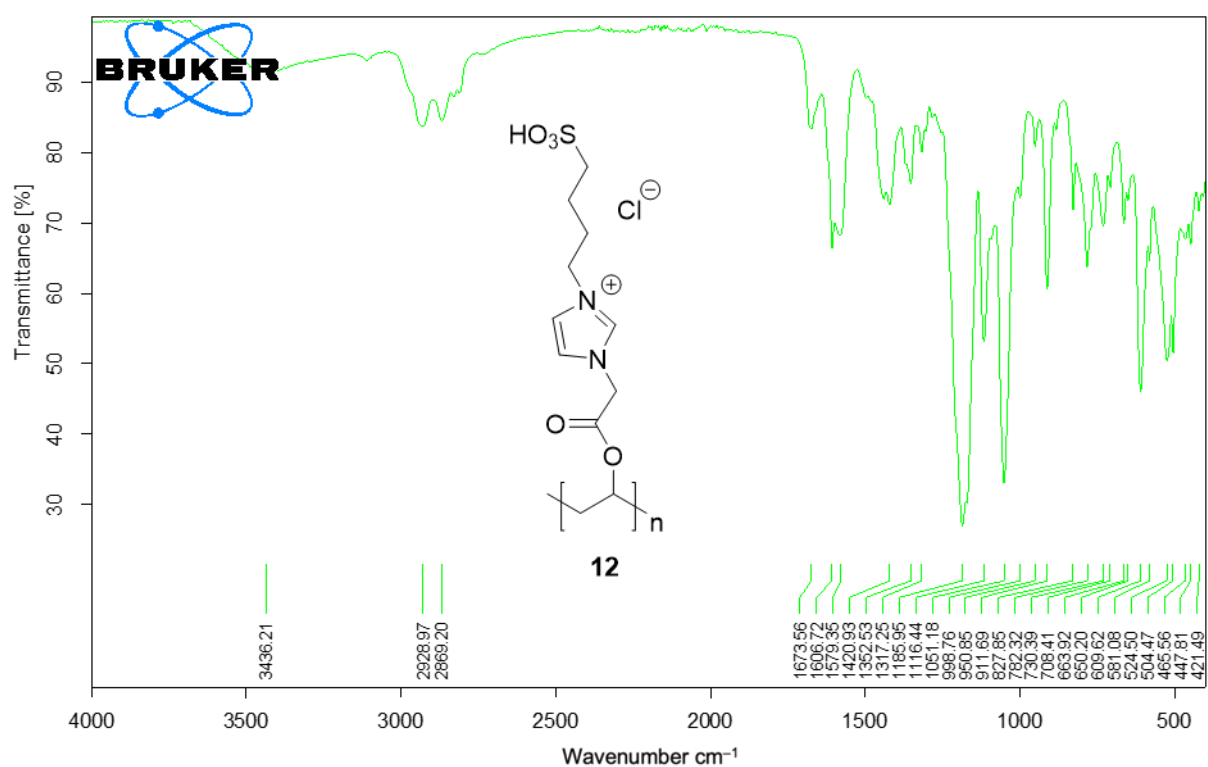

Figure S9. IR spectrum of polymer VI (PVA-ImSO<sub>3</sub>H) (12)

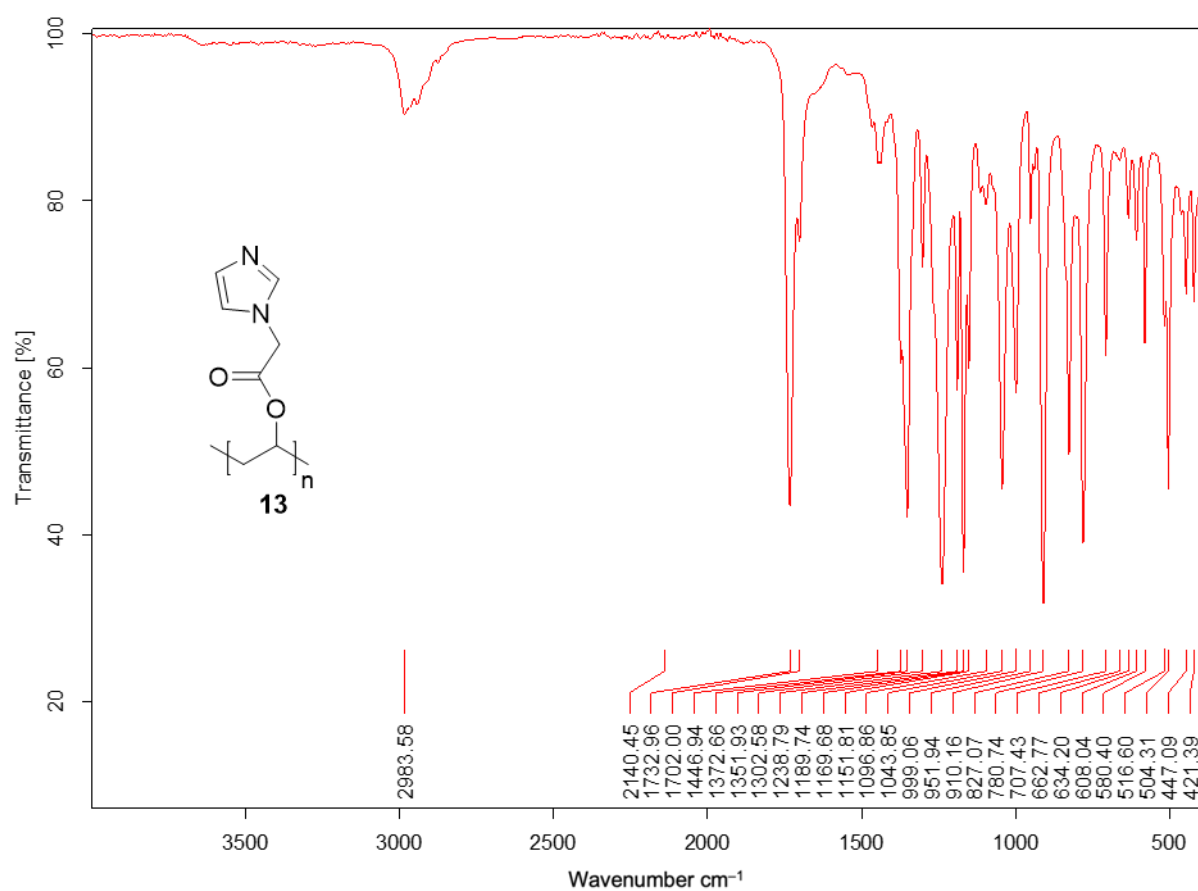

Figure S10. IR spectrum of Polymer VII (PVA-Im) (**13**)

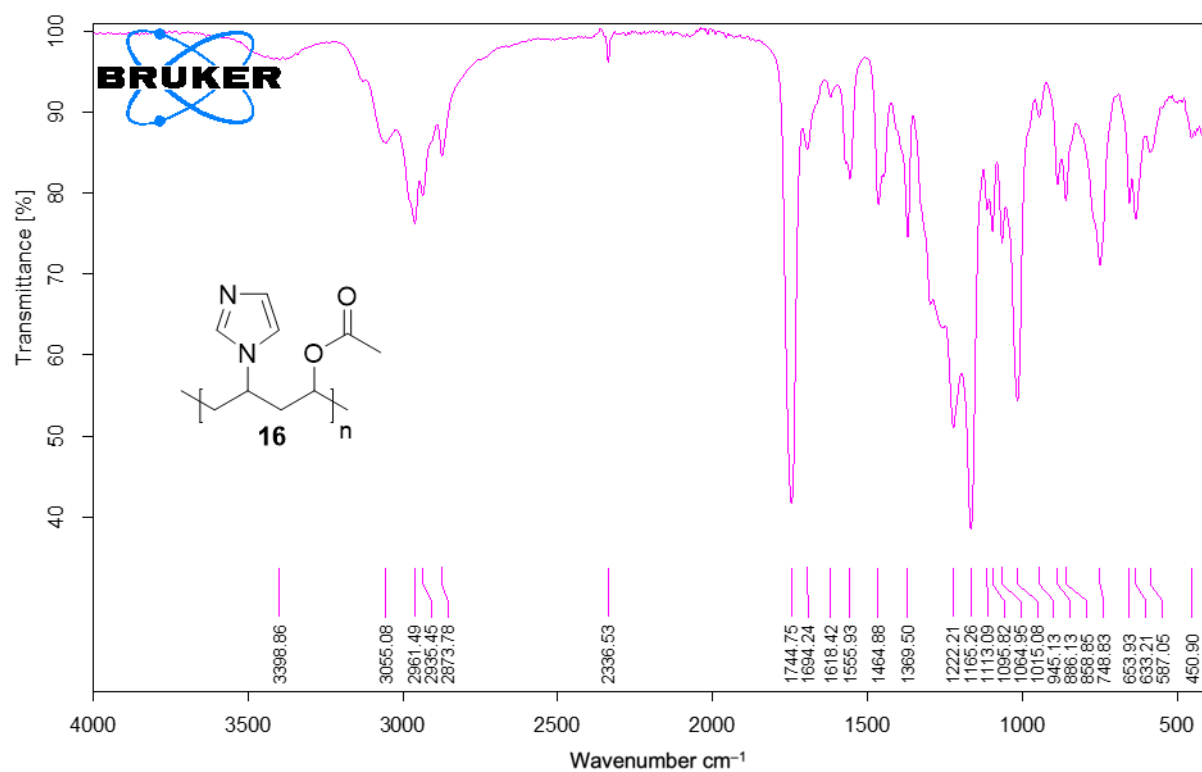

Figure S11. IR spectrum of copolymer I (Co-NVIm-VAc) (**16**)

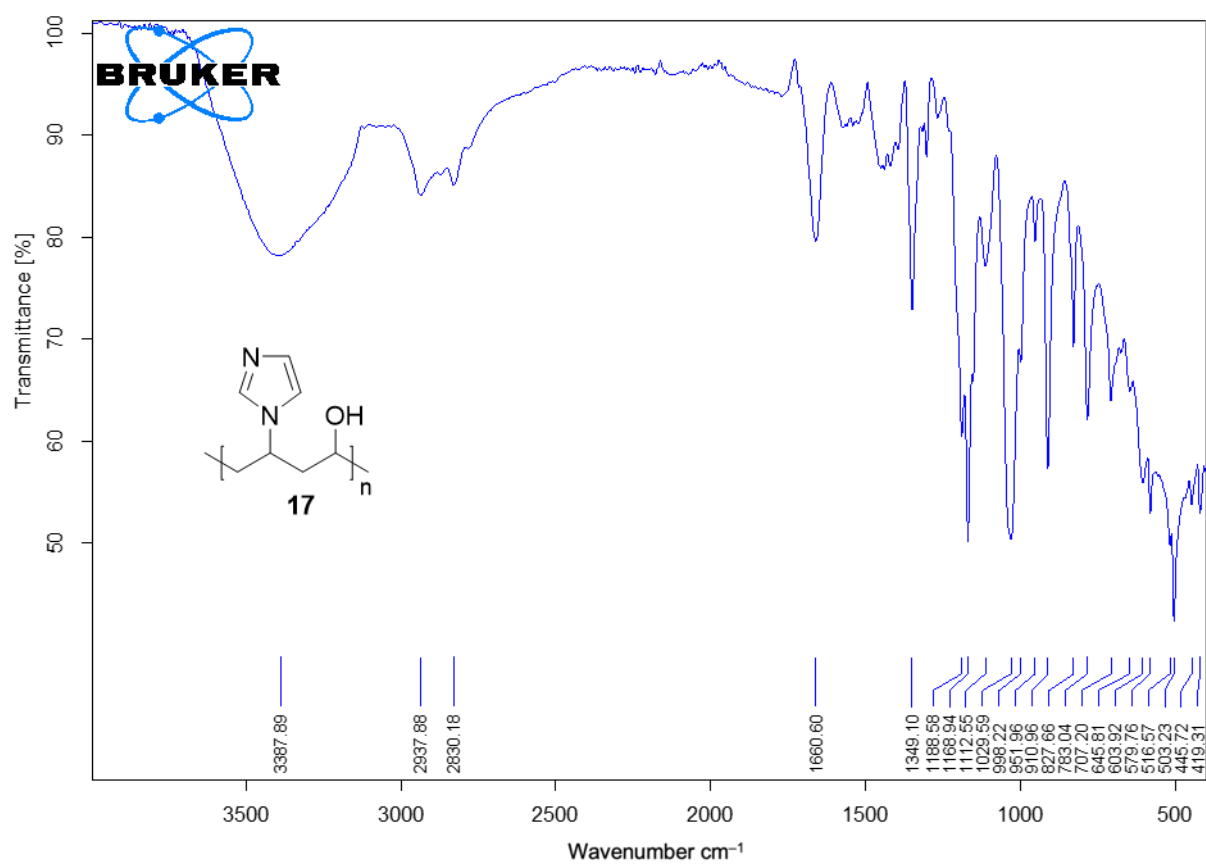

Figure S12. IR spectrum of copolymer II (Co-NVIm-PVA) (17)

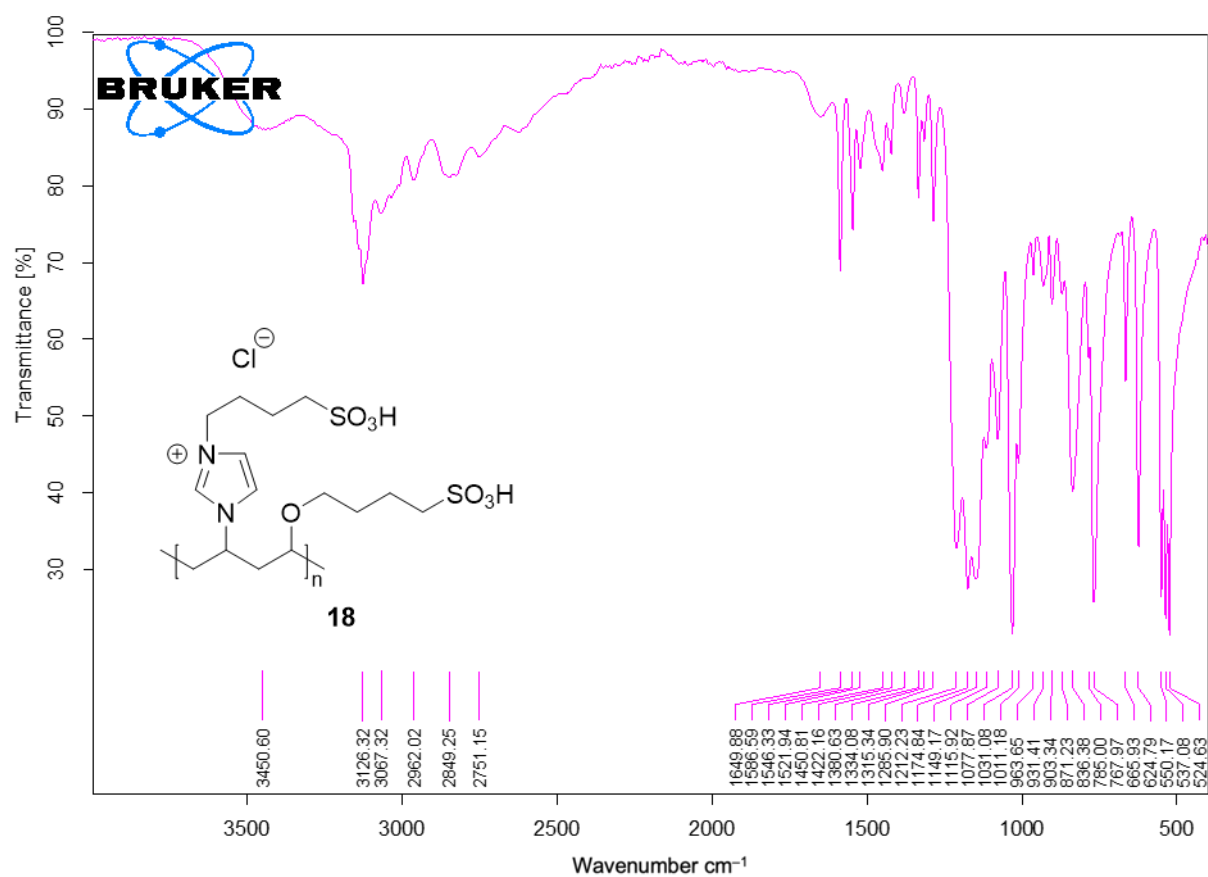

Figure S13. IR spectrum of copolymer III (Co-NVIm-PVA-1,4) (**18**)

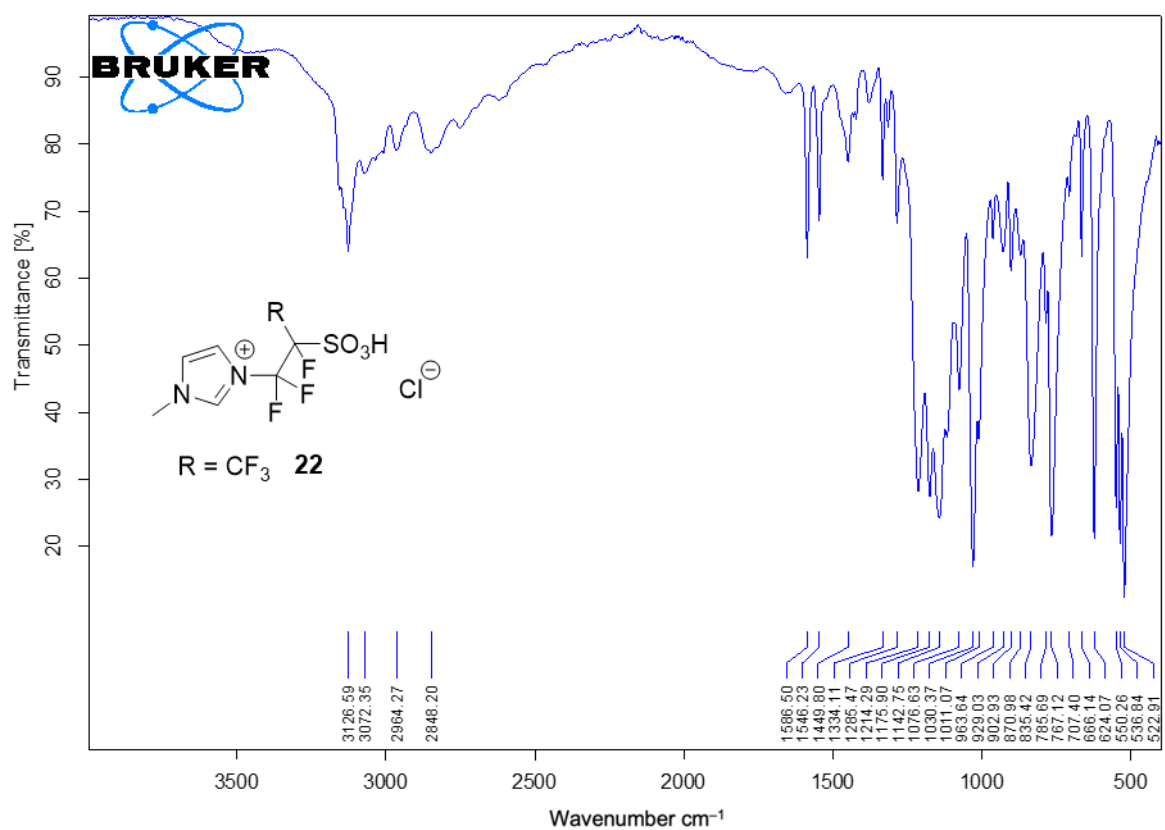

Figure S14. IR spectrum of IL I (**22**)

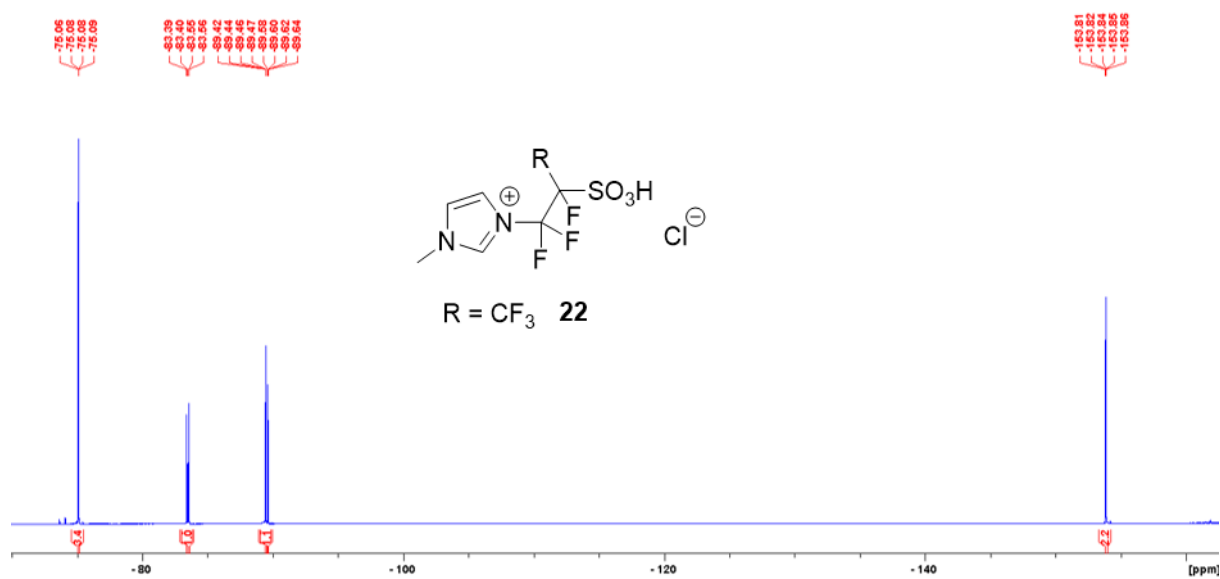

Figure S15.  $^{19}\text{F}$  NMR spectrum of IL I (22)

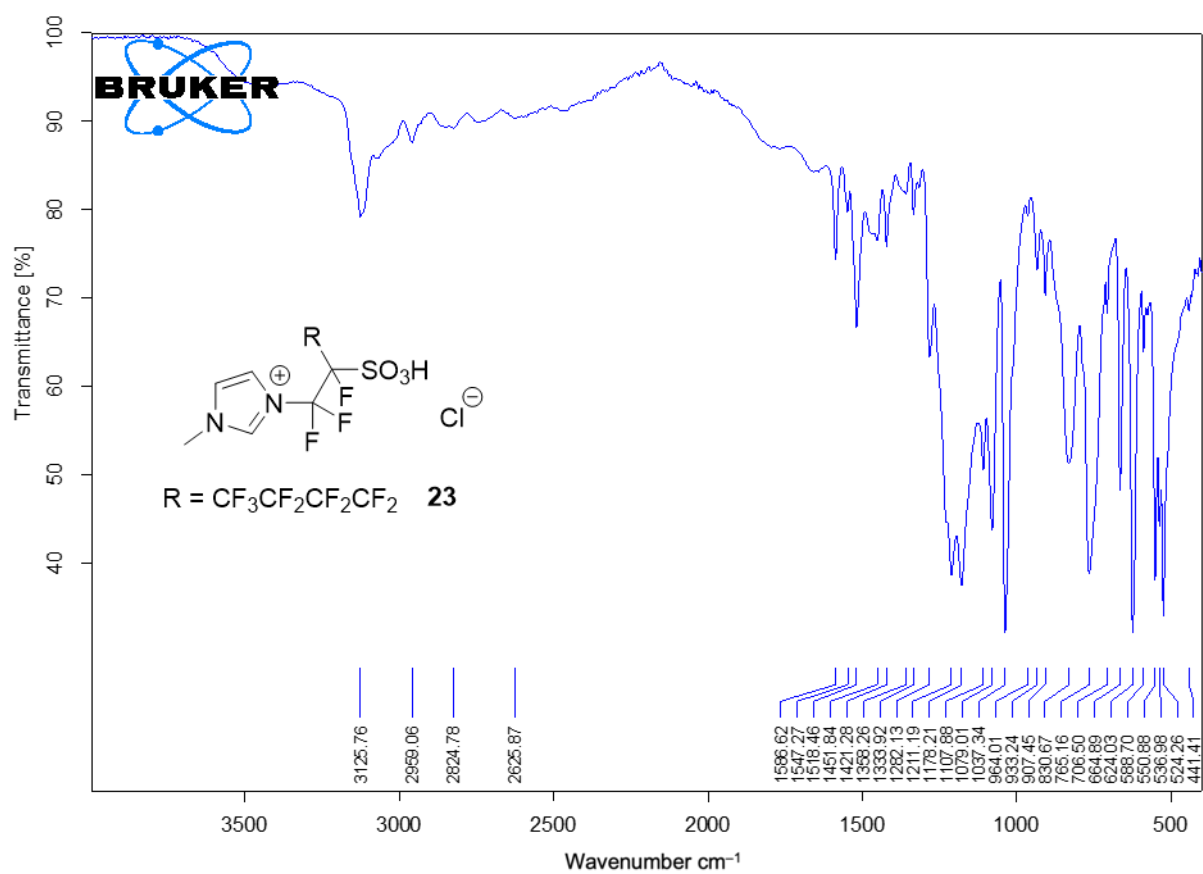

Figure S16. IR spectrum of IL II (**23**)



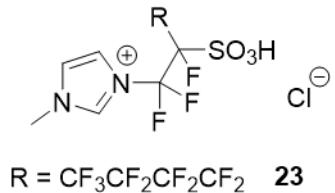

17

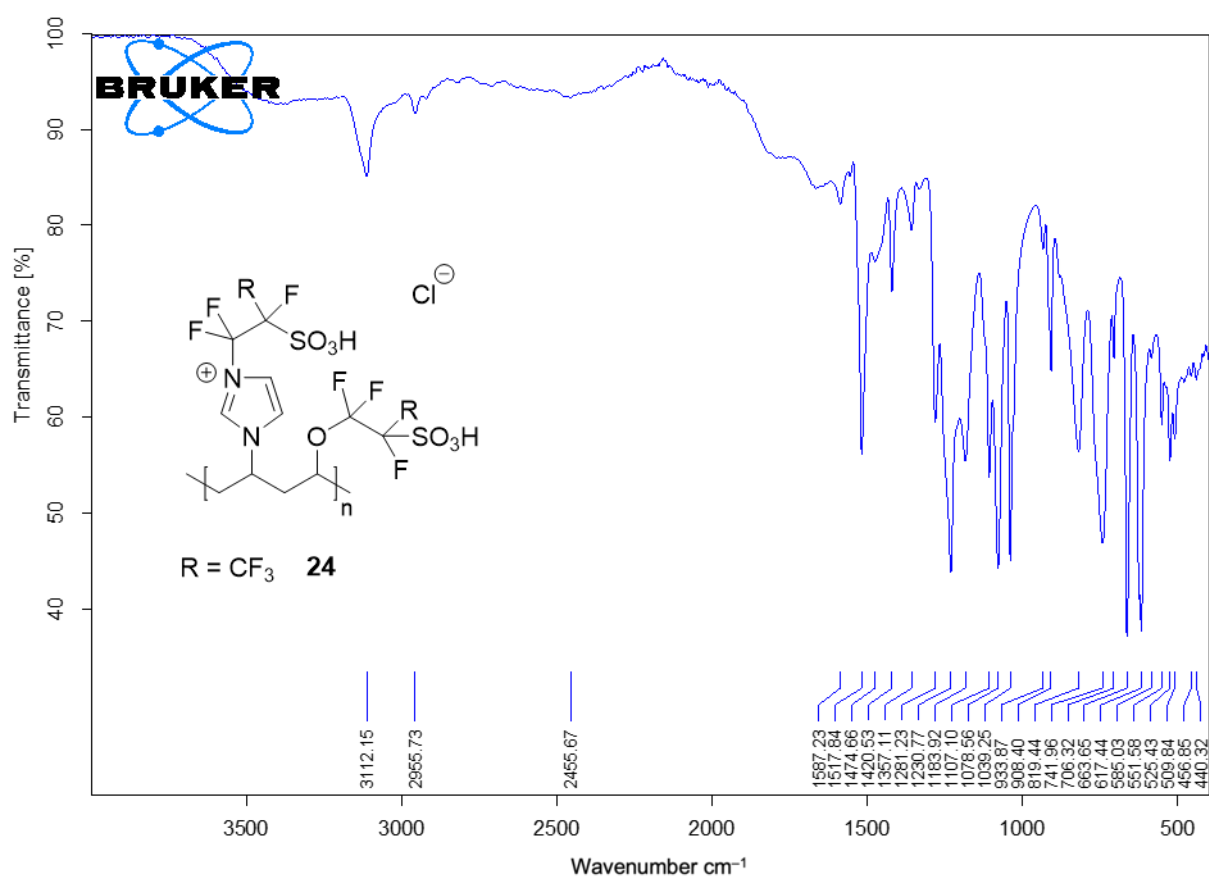

Figure S18. IR spectrum of copolymer IV (Co-NVIm-PVA-6F) (24)

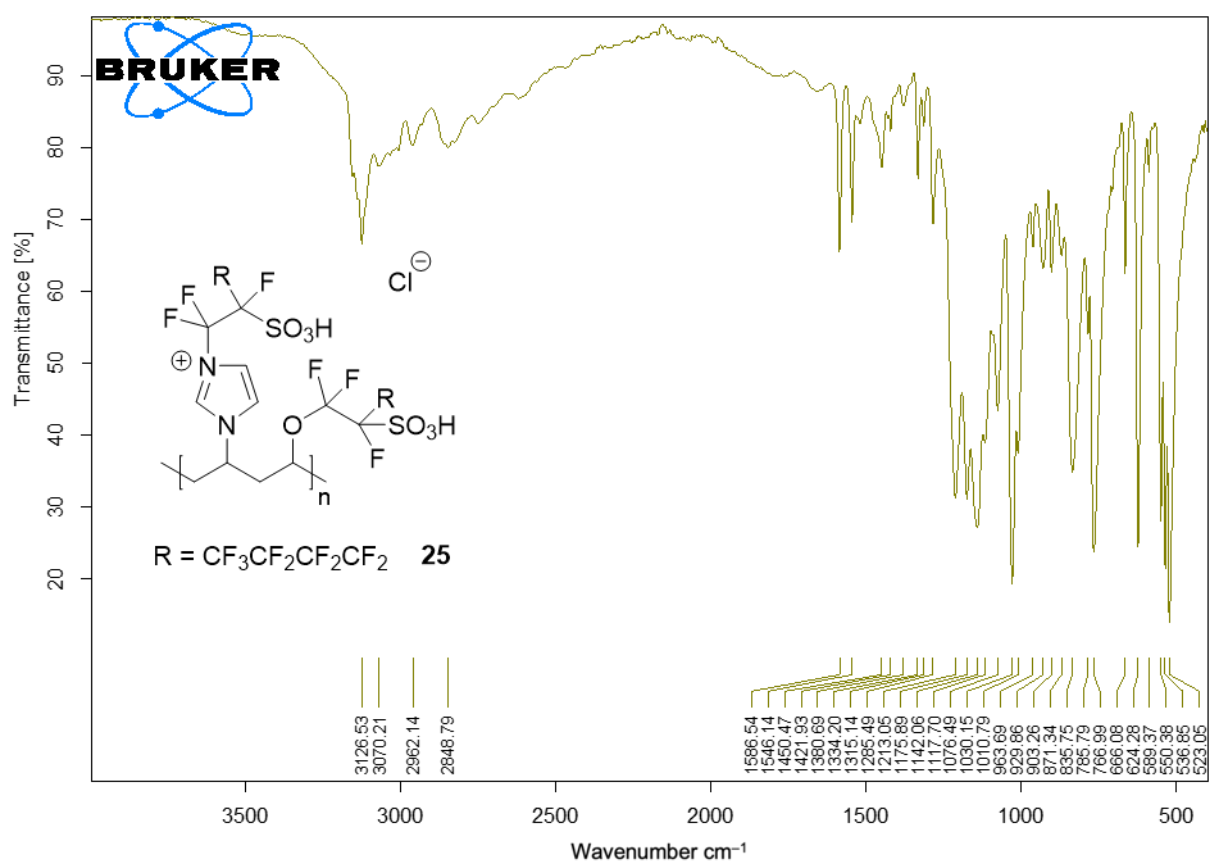

Figure S19. IR spectrum of copolymer V (Co-NVIm-PVA-12F) (25)
